# Supplementary material for: Analysis of metabonomic profiling alterations in a mouse model of colitis-associated cancer and 2-deoxy-d-glucose treatment
Source: Royal Society of Chemistry journal article supplement (doi:10.1039/c6ra01718e), 2016-01-01
Supplement: c6ra01718e1.pdf [file c6ra01718e1.pdf]

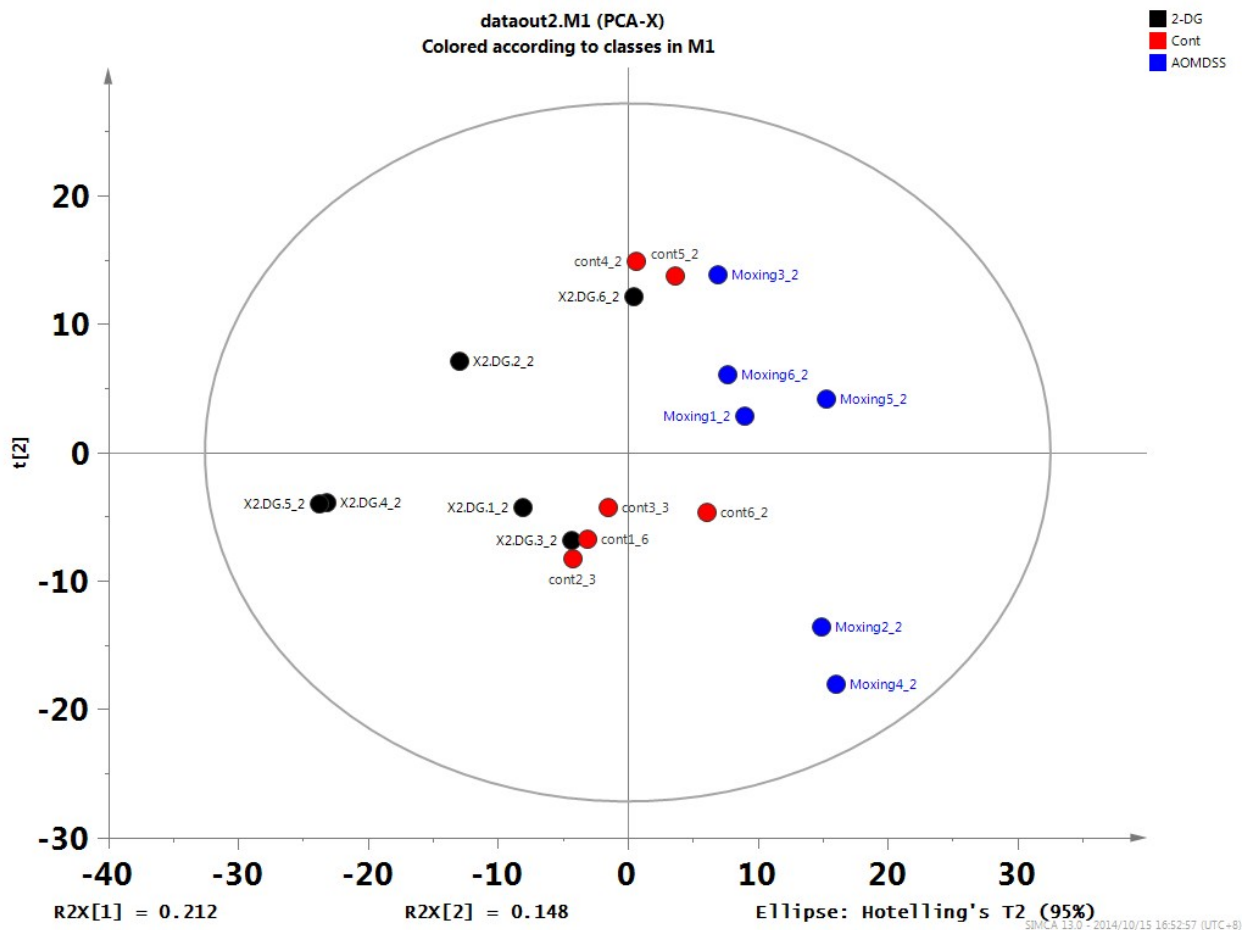

### Supplementary data

**Fig. S1. PCA results for the control group, the AOM/DSS group and 2-DG-AOM/DSS group.**

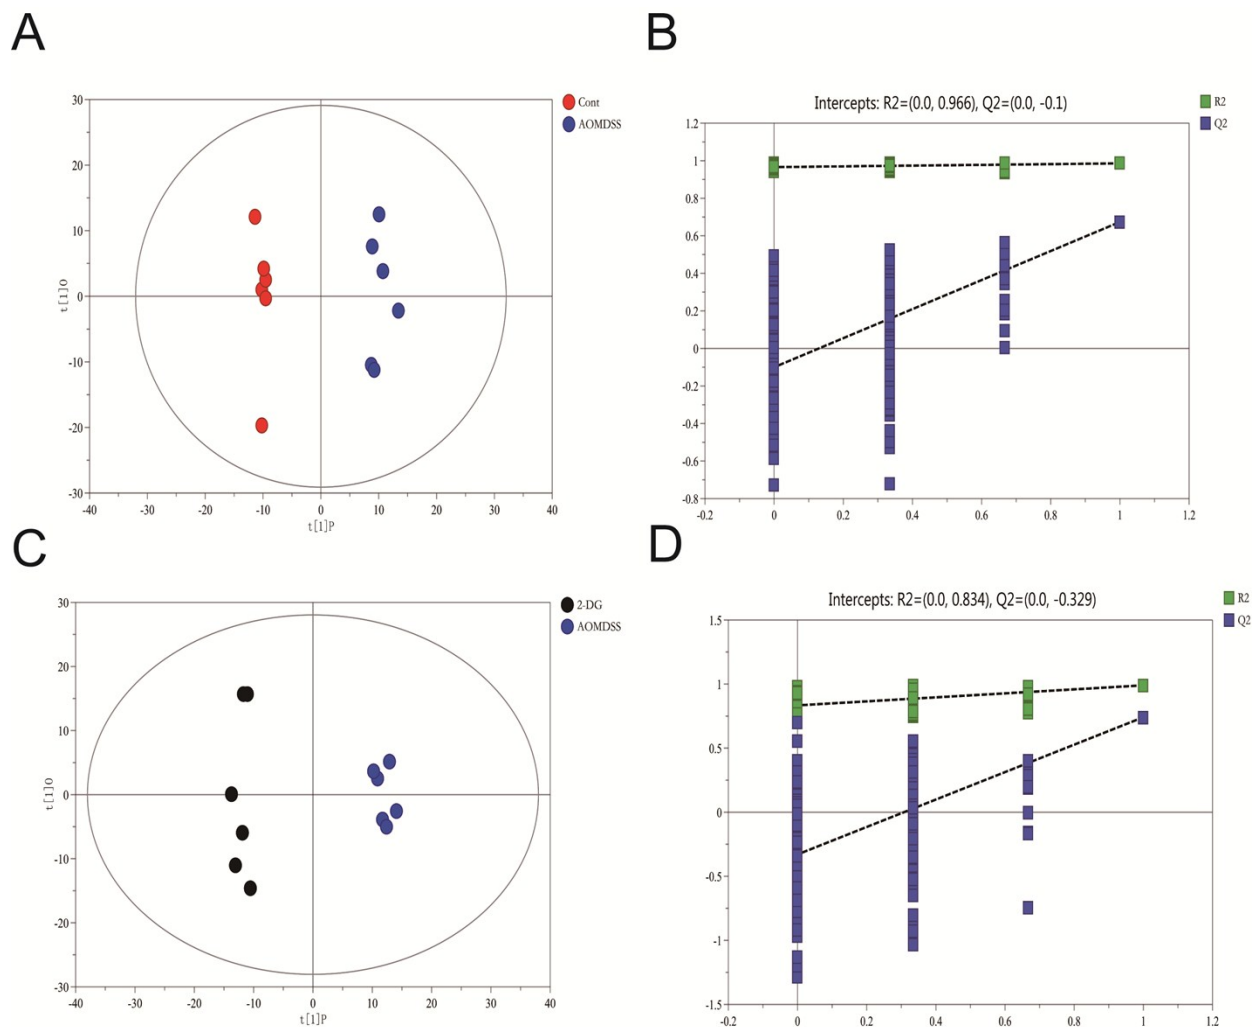

**Fig. S2. OPLS-DA model plots for all groups.**

OPLS-DA scores plot based on GC-TOF/MS depicted metabolic profiles from the control group vs the AOM/DSS group (A) and the AOM/DSS group vs 2-DG group (C). The corresponding validation plots (B and D) based on 200 times permutation tests demonstrated the robustness of the OPLS-DA models.
